## Protective Effect of Stroma-free Methemoglobin during Cyanide Poisoning in Dogs

Peter H. Breen, M.D., F.R.C.P.C.,\* Schlomo A. Isserles, M.D.,† Eric Tabac, Ph.D.,‡ Michael F. Roizen, M.D.,§ Uri Z. Taitelman, M.D., D.A.B.T.||

**Background:** During fire exposure, cyanide toxicity can block aerobic metabolism. Oxygen and sodium thiosulfate are accepted therapy. However, nitrite-induced methemoglobinemia, which avidly binds cyanide, decreases oxygen-carrying capacity that is already reduced by the presence of carboxyhemoglobin (inhalation of carbon monoxide in smoke). This study tested whether exogenous stroma-free methemoglobin (SFmetHb) can prevent depression of hemodynamics and metabolism during canine cyanide poisoning.

**Methods:** In 10 dogs (weighing  $18.8 \pm 3.5$  kg) anesthetized with chloralose-urethane and mechanically ventilated with air, baseline hemodynamic and metabolic measurements were made. Then,  $137 \pm 31$  ml of 12 g% SFmetHb was infused into five dogs (SFmetHb group). Finally, the SFmetHb group and the control group ( $n = 5$ , no SFmetHb) received an intravenous potassium cyanide infusion ( $0.072 \text{ mg} \cdot \text{kg}^{-1} \cdot \text{min}^{-1}$ ) for 20 min. Oxygen consumption ( $\dot{V}_{O_2}$ ) was measured with a Datex Deltatrac (Datex Instruments, Helsinki, Finland) metabolic monitor and cardiac output (QT) was measured by pulmonary artery thermodilution.

**Results:** From baseline to cyanide infusion in the control group, QT decreased significantly ( $p < 0.05$ ) from  $2.9 \pm 0.8$  to

$1.5 \pm 0.4$  l/min, mixed venous  $P_{CO_2}$  ( $P\bar{V}_{CO_2}$ ) tended to decrease from  $35 \pm 4$  to  $23 \pm 2$  mmHg,  $P\bar{V}_{O_2}$  increased from  $43 \pm 4$  to  $62 \pm 8$  mmHg,  $\dot{V}_{O_2}$  decreased from  $93 \pm 8$  to  $64 \pm 19$  ml/min, and lactate increased from  $2.3 \pm 0.5$  to  $7.1 \pm 0.7$  mM. In the SFmetHb group, cyanide infusion did not significantly change these variables. From baseline to infused cyanide, the increases in blood cyanide ( $4.8 \pm 1.0$  to  $452 \pm 97 \mu\text{M}$ ) and plasma thiocyanate cyanide ( $18 \pm 5$  to  $65 \pm 22 \mu\text{M}$ ) in the SFmetHb group were significantly greater than those increases in the control group. SFmetHb itself caused no physiologic changes, except small decreases in heart rate and  $P\bar{V}_{O_2}$ . Peak SFmetHb reached  $7.7 \pm 1.0\%$  of total hemoglobin.

**Conclusions:** Prophylactic intravenous SFmetHb preserved cardiovascular and metabolic function in dogs exposed to significant intravenous cyanide. Blood concentrations of cyanide, and its metabolite, thiocyanate, revealed that SFmetHb trapped significant cyanide in blood before tissue penetration. (Key words: Gases: carbon monoxide. Heart: cardiovascular function. Metabolism: cellular aerobic. Toxicity: cyanide; smoke inhalation; thiocyanate. Pharmacology: nitrites; thiosulfate.)

A major cause of death in house fires in the United States is inhalation of toxic compounds, especially carbon monoxide and cyanide. Fire victims may inhale smoke containing toxic amounts of hydrogen cyanide gas.<sup>1-5</sup> Hydrogen cyanide is produced in fires by the thermal decomposition of nitrogenous materials, including natural fibers (wool and silk) and synthetic polymers (polyurethane and polyacrylonitrile).<sup>3,6,7</sup> Cyanide binds to intracellular cytochrome oxidase, the last cytochrome in oxidative phosphorylation, to block cellular aerobic metabolism<sup>6,8,9</sup> and decrease the tissue utilization of oxygen.

Standard treatment includes the administration of oxygen, sodium thiosulfate, and sodium or amyl nitrite.<sup>5</sup> Treatment with oxygen during cyanide poisoning is well established<sup>10-12</sup> and is essentially devoid of side effects. Sodium thiosulfate, which increases the enzymatic conversion of cyanide to thiocyanate,<sup>1,2,9</sup> also is commonly used during cyanide poisoning.<sup>5</sup>

Sodium or amyl nitrite is administered to induce intraerythrocyte methemoglobinemia, which avidly

\* Assistant Professor in Residence, Department of Anesthesiology, University of California at Irvine.

† Head, Ambulatory Anesthesia, Anesthesiology Department, The Technion-Israel Institute of Technology, Rambam Medical Center, Haifa, Israel.

‡ Research Associate and ||Associate Professor of Medicine and Head, Israel Poison Information Center, The Technion-Israel Institute of Technology, Rambam Medical Center, Haifa, Israel

§ Professor and Chair, Department of Anesthesia & Critical Care, University of Chicago.

Received from the University of California at Irvine, Orange, California, The Technion-Israel Institute of Technology, Rambam Medical Center, Haifa, Israel, and the University of Chicago, Chicago, Illinois. Submitted for publication September 1, 1995. Accepted for publication May 1, 1996. Supported by the National Heart, Lung, and Blood Institute grant HL-42637 and the Clinical Practice Enhancement & Anesthesia Research Foundation. Presented in abstract form at the annual meeting of the American Society of Anesthesiologists, October 25, 1995.

Address reprint requests to Dr. Breen: Department of Anesthesiology, University of California, Irvine, UCI Medical Center, 101 City Drive South, Orange, California 92868-1491. Address electronic mail to: pbreen@uci.edu.

binds cyanide.<sup>5</sup> Hemoglobinemia to treat cyanide poisoning is indicated by the presence of incomplete conversion of cyanide to thiocyanate and the presence of carboxyhemoglobin<sup>3</sup> and shunting of the cyanide curve to the left, indicating a decreased oxygen-carrying capacity. This suggested a synergistic effect of cyanide on oxygen-carrying capacity, resulting in lower concentrations of oxygenated hemoglobin that are present in the blood.

Thus, the induction of methemoglobinemia with nitrite during cyanide poisoning may be a useful adjunct to oxygen therapy. The oxygen-carrying capacity is decreased by the presence of carboxyhemoglobin, and the presence of methemoglobin may result in inadequate oxygen delivery with significant consequences. The eventual elimination of methemoglobin depends on the rate of conversion of methemoglobin to hemoglobin, a process that is accelerated by the administration of ascorbic acid.<sup>17</sup>

Alternatively, the administration of methemoglobin during cyanide poisoning is appropriate because methemoglobin is in the blood and does not undergo any reduction. The administration of SFmetHb is effective in the treatment of cyanide poisoning because its functions were not affected by the presence of cyanide.

However, in the presence of carbon monoxide and cyanide, the critical reduction of cytochrome oxidase function (except for the minimum of cessation of life) is a life-threatening situation. The extraction of the cyanide from the blood would facilitate the restoration of metabolic function. The administration of the prophylactic treatment of cyanide toxicity of cyanide poisoning could reach the prophylaxis against cyanide poisoning, including the treatment of industrial accidents.

# In one treatment of cyanide poisoning, the administration of the pulmonary artery catheter is indicated.

## STROMA-FREE METHEMOGLOBIN DURING CYANIDE POISONING

binds cyanide.<sup>5</sup> However, nitrite-induced methemoglobinemia to treat cyanide poisoning from fires is complicated by the presence of carbon monoxide, a common incomplete combustion product in smoke.<sup>1</sup> Carbon monoxide converts oxyhemoglobin to carboxyhemoglobin<sup>3</sup> and shifts the oxyhemoglobin dissociation curve to the left,<sup>6</sup> which decreases the oxygen-delivering capacity to the tissues. In fact, studies have suggested a synergistic effect of carbon monoxide and cyanide on oxygen metabolism in the body, such that lower concentrations of each gas are more toxic when they are present together.<sup>4,6,7,13,14</sup>

Thus, the induction of endogenous methemoglobinemia with nitrite may be dangerous when oxygen-carrying capacity is already reduced by the presence of carboxyhemoglobin.<sup>1,2,9,15,16</sup> In addition, the formation of adequate methemoglobin can take 30–70 min<sup>5,16</sup> with significant variability among patients. Finally, eventual elimination of cyanide bound as cyanmethemoglobin depends on the conversion of cyanide to thiocyanate,<sup>17</sup> a reaction hastened by sodium thiosulfate.

Alternatively, the infusion of exogenous stroma-free methemoglobin solution (SFmetHb) during cyanide poisoning is appealing. On intravenous injection, methemoglobin is instantly available to bind cyanide without any reduction in oxygen-carrying capacity. In rats,<sup>17</sup> SFmetHb effectively treated the otherwise lethal effects of cyanide poisoning, but circulatory or gas exchange functions were not studied.

However, in previous studies of combined cyanide and carbon monoxide in the dog,<sup>1,2</sup> we demonstrated that critical recovery of cardiovascular and metabolic function (except lactic acidosis) occurred within 15 min of cessation of cyanide exposure. Thus, in a real-life situation of cyanide toxicity such as a house fire, extraction of the victim from the cyanide exposure would facilitate recovery of critical cardiovascular and metabolic function probably before a further antidote could be administered. Alternatively, we reasoned that the prophylactic administration of SFmetHb could prevent toxicity of subsequent exposure to cyanide by chelating and trapping cyanide in the blood before it could reach the tissues. Clinical scenarios, in which prophylaxis against potential cyanide exposure is attractive, include rescue workers entering a fire or industrial accident and soldiers at risk from chemical

warfare. Accordingly, in this study, we test the hypothesis that SFmetHb can prevent the depression of cardiovascular and metabolic function that occurs in a canine model of cyanide poisoning, by binding and trapping cyanide in the blood before it can reach the intracellular compartment and block aerobic metabolism.

## Materials and Methods

### General Preparations

This study was conducted in accordance with the American Physiologic Society's Guiding Principles in the Care and Use of Animals and was approved by the institutional Animal Care Committee. Ten dogs (18.8 ± 3.5 kg) were anesthetized with 160 mg/kg intravenous chloralose and 800 mg/kg urethane. Further maintenance doses of chloralose (20 mg/kg) and urethane (100 mg/kg) were administered as necessary. After tracheal intubation, the lungs were mechanically ventilated (Harvard respirator, Model 613, South Natick, MA) with air and the animal was positioned supine for the remainder of the experiment. Tidal volume (311 ± 56 ml) and frequency (20.5 ± 2.0 min<sup>-1</sup>) were adjusted to maintain Pa<sub>CO<sub>2</sub></sub> near 32 mmHg. The exhaled port of the ventilator was connected to the input of the Deltatrac metabolic monitor (Datex Instruments, Helsinki, Finland).

A catheter was inserted in a femoral vein for administration of drugs and normal saline. Another catheter was placed in the femoral artery for sampling of arterial blood and measurement of arterial blood pressure. Through the right external jugular vein, a thermistor-tipped flotation catheter was positioned in a pulmonary artery branch (by pressure monitoring) for mixed venous blood sampling and measurements of pulmonary artery, pulmonary wedge pressures, and thermodilution cardiac output (Model 9510A Edwards cardiac output computer, Irvine, CA). Through the left external jugular vein, another flotation catheter was positioned in the right side of the heart for administration of the cyanide infusion.<sup>#</sup> Vascular pressures were measured with Gould transducers (model P23, Gould, Oxnard, CA) and displayed on a polygraph recorder.

### Experimental Protocol

Before the experimental protocol began, sodium bicarbonate was infused (about 2 mEq/kg) to facilitate a physiologic baseline arterial pH level (7.43 ± 0.07);

<sup>#</sup> In one treatment dog, cyanide was infused through the distal port of the pulmonary artery catheter and pancuronium was administered.



**Table 1. Selected Measurements in the Control Group (n = 5) and SFmetHb Group (n = 5) of Dogs at Baseline, after Intravenous Administration of Stroma-free Methemoglobin in the SFmetHb Group, and at the End of the Cyanide Infusion**

|                           | Control Group |              | SFmetHb Group |             |              |
|---------------------------|---------------|--------------|---------------|-------------|--------------|
|                           | Baseline      | CN           | Baseline      | SFmetHb     | CN           |
| Psa (mmHg)                | 126 ± 23      | 101 ± 23     | 142 ± 13      | 145 ± 11    | 146 ± 11     |
| HR (min <sup>-1</sup> )   | 122 ± 17      | 126 ± 36     | 163 ± 41      | 136 ± 44†   | 166 ± 37     |
| Ppa (mmHg)                | 12.8 ± 0.8    | 24.2 ± 5.5*  | 10.2 ± 4.1    | 12.4 ± 6.0  | 16.2 ± 9.6*  |
| pH <sub>v</sub>           | 7.43 ± 0.03   | 7.39 ± 0.08  | 7.41 ± 0.09   | 7.39 ± 0.09 | 7.39 ± 0.07  |
| $\dot{V}_{CO_2}$ (ml/min) | 83 ± 8        | 89 ± 19      | 83 ± 33       | 82 ± 34     | 92 ± 41†     |
| metHb (% total Hb)        | 2.1 ± 1.2     | 1.8 ± 1.7    | 0.6 ± 0.4     | 7.7 ± 1.0†  | 2.9 ± 0.9*   |
| Blood [CN] (μM)           | 2.2 ± 2.0     | 113 ± 33*    | 4.8 ± 1.0     | 2.6 ± 0.4†  | 452 ± 97*    |
| Plasma [CN] (μM)          |               |              | 3.3 ± 2.4     | 3.2 ± 3.9   | 612 ± 111†   |
| Plasma [SCN] (μM)         | 27.6 ± 11.0   | 45.7 ± 16.9* | 17.6 ± 4.9    | 17.1 ± 6.0  | 65.3 ± 22.1† |

Values are mean ± SD.

Psa = systemic arterial blood pressure; HR = heart rate; Ppa = pulmonary arterial blood pressure; pH<sub>v</sub> = venous blood pH (n = 4 in control group);  $\dot{V}_{CO_2}$  = pulmonary CO<sub>2</sub> elimination; metHb = methemoglobin (percent of total hemoglobin, n = 4 in control group); blood [CN] = cyanide concentration; plasma [SCN] = thiocyanate concentration (n = 4 in SFmetHb group).

\*Significant difference ( $P < 0.05$ ) from baseline.

†Significant difference ( $P < 0.05$ ) from other stages.

thereafter, no further sodium bicarbonate was administered.

For the SFmetHb group, baseline measurements consisted of blood temperature, hemodynamics, oxygen consumption ( $\dot{V}_{O_2}$ ), carbon dioxide production ( $\dot{V}_{CO_2}$ ), and minute ventilation ( $\dot{V}_E$ ), and simultaneous samples of arterial and mixed venous blood. Then, SFmetHb (137 ± 31 ml, 12 g%) was slowly infused into the femoral vein. After 15 min, the measurement sequence was repeated (SFmetHb stage). Then, the cyanide infusion began and the measurement sequence was repeated after 20 min of cyanide infusion (cyanide stage). The control group of animals followed a similar protocol except that SFmetHb was not administered.

The commercially prepared bovine stroma-free hemoglobin (Biopure Corporation, Boston, MA) was stored at -20° C. After thawing, it was incubated with an equimolar amount of sodium nitrite for 1 h during gentle stirring. Then, the SFmetHb was dialyzed through 12-14,000 M.W. pore membrane (Spectra/Por, Thomas Scientific, Swedesboro, NJ) four times during 48 hours in a bath of sterile normal saline for cleansing and to remove any traces of residual sodium nitrite. Conversion of hemoglobin to methemoglobin was confirmed by spectrophotometric measurement at 630 nm (Spectronic 601, Milton Roy, Rochester, NY).

Potassium cyanide was prepared each experimental day. Two drops of 0.1 N NaOH were added to alkalize 10 ml 0.9% sodium chloride (NaCl) before adding potassium

cyanide powder. For each dog, we prepared a potassium cyanide solution that delivered 0.072 mg · kg<sup>-1</sup> · min<sup>-1</sup> when infused at 1 ml/min.<sup>11</sup> We infused this cyanide solution through the catheter positioned in the right heart.<sup>12</sup>

#### Data Analysis

The pH level, P<sub>CO<sub>2</sub></sub>, and P<sub>O<sub>2</sub></sub> of blood samples were measured at 37°C in a blood gas analyzer (Nova 5, Nova Biomedical, Waltham, MA) and corrected to body temperature.<sup>18</sup> Fractions of oxyhemoglobin, carboxyhemoglobin, and methemoglobin and total hemoglobin concentration were measured by coximetry (model IL 482, Instrumentation Laboratory, Lexington, MA). To measure lactate, blood samples were processed by reagent methods (Diagnostic Reagents, Sigma Chemical, St. Louis, MO) and ultraviolet light absorption (340 nm) was measured on a spectrophotometer (model 300N, Gilford Instrument, Oberlin, OH). Minute ventilation ( $\dot{V}_E$ ), oxygen consumption ( $\dot{V}_{O_2}$ ), and carbon dioxide production ( $\dot{V}_{CO_2}$ ) were measured with the metabolic monitor (Deltatrac), which employed a constant flow generator and the Haldane transformation to calculate differences between inspired and expired flows. According to standard convention,  $\dot{V}_{O_2}$  and  $\dot{V}_{CO_2}$  were expressed as standard temperature and pressure (dry), while  $\dot{V}_E$  was reported as body temperature and pressure (saturated).

To measure blood cyanide concentration,<sup>19</sup> the hydrogen cyanide in the headspace above acidified blood

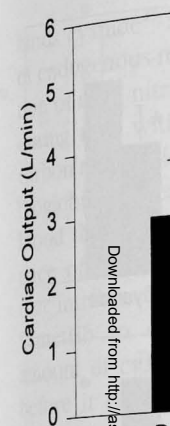

**Fig. 1. Cardiac output in the stroma-free methemoglobin group at baseline, after intravenous administration of stroma-free methemoglobin, and at the end of the cyanide infusion.**

was detected by a Hewlett-Packard 8452A spectrophotometer from blood by the cyanide-nitroprusside technique.<sup>20</sup> In the SFmetHb group, the plasma cyanide concentration was measured. We used Student's t-test for repeated-measures (within group) to test for differences between stages.<sup>21</sup> If population variances were equal, we used the t-test; otherwise, we used the Friedman test on ranks, respectively. If  $P < 0.05$ , the difference was significant. Student-Newman-Keuls test was used for multiple comparisons. Results are reported as mean ± SD.

#### Results

The administration of stroma-free methemoglobin to the control group caused no significant changes in hemodynamic and metabolic variables (n = 5),

## STROMA-FREE METHEMOGLOBIN DURING CYANIDE POISONING

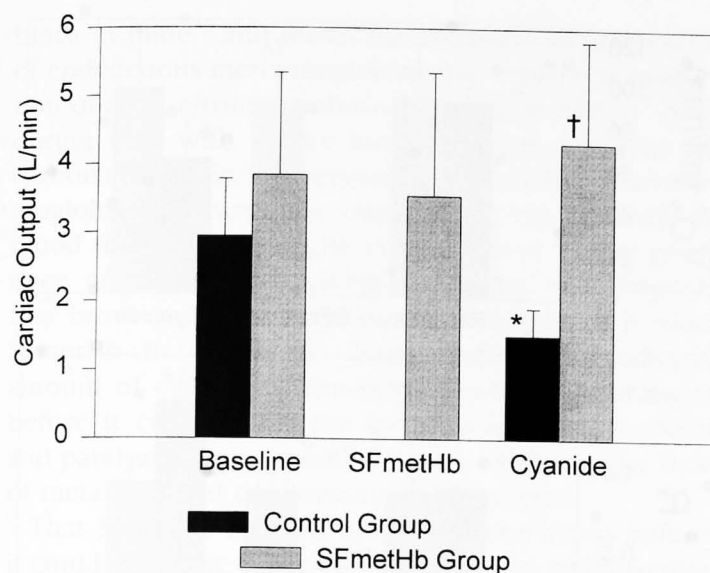

Fig. 1. Cardiac output (mean  $\pm$  SD,  $n = 5$ ) in the control and stroma-free methemoglobin groups of dogs at baseline, after intravenous administration of stroma-free methemoglobin in the stroma-free methemoglobin group, and at the end of the cyanide infusion. \*Significant difference ( $P < 0.05$ ) from baseline. †Significant difference ( $P < 0.05$ ) from the stroma-free methemoglobin measurement.

was detected by gas chromatography (model 5790, Hewlett-Packard, Avondale, PA). Plasma was separated from blood by centrifugation. Then, plasma thiocyanate concentration was measured by a colorimetric technique,<sup>20</sup> using a spectrophotometer at 520 nm. In the SFmethHb group, we also measured cyanide concentration in the plasma.

We used Student's paired  $t$  test (control group) or repeated-measures analysis of variance (SFmethHb group) to test each variable for differences among stages.<sup>21</sup> If populations did not have normal distributions or equal variances about the mean, nonparametric tests were employed (Wilcoxon signed rank test and Friedman repeated measures analysis of variance on ranks, respectively). For a significant  $F$  statistic ( $P < 0.05$ ), the differing stages were identified by the Student-Newman-Keuls multiple comparison test. Data are reported as mean  $\pm$  SD.

## Results

The administration of SFmethHb to the SFmethHb group caused no physiologic changes in cardiovascular and metabolic variables (within the statistical constraints of  $n = 5$ ), with the exception of small decreases

in heart rate (table 1) and  $P\bar{V}O_2$  (fig. 2, middle). Peak measured SFmethHb reached  $7.7 \pm 1.0\%$  of total hemoglobin (table 1). After administration of SFmethHb, its renal excretion during the experiment was evident by the appearance of dark urine. The decrease in percent oxyhemoglobin ( $89.5\% \pm 1.7\%$  to  $84.0\% \pm 2.2\%$ ) was mostly caused by the added exogenous methemoglobin.

At the end of the cyanide infusion in the control group (fig. 1),  $\dot{Q}_T$  decreased significantly ( $P < 0.05$ ) to  $1.5 \pm 0.4$  l/min, from the baseline value of  $2.9 \pm 0.8$

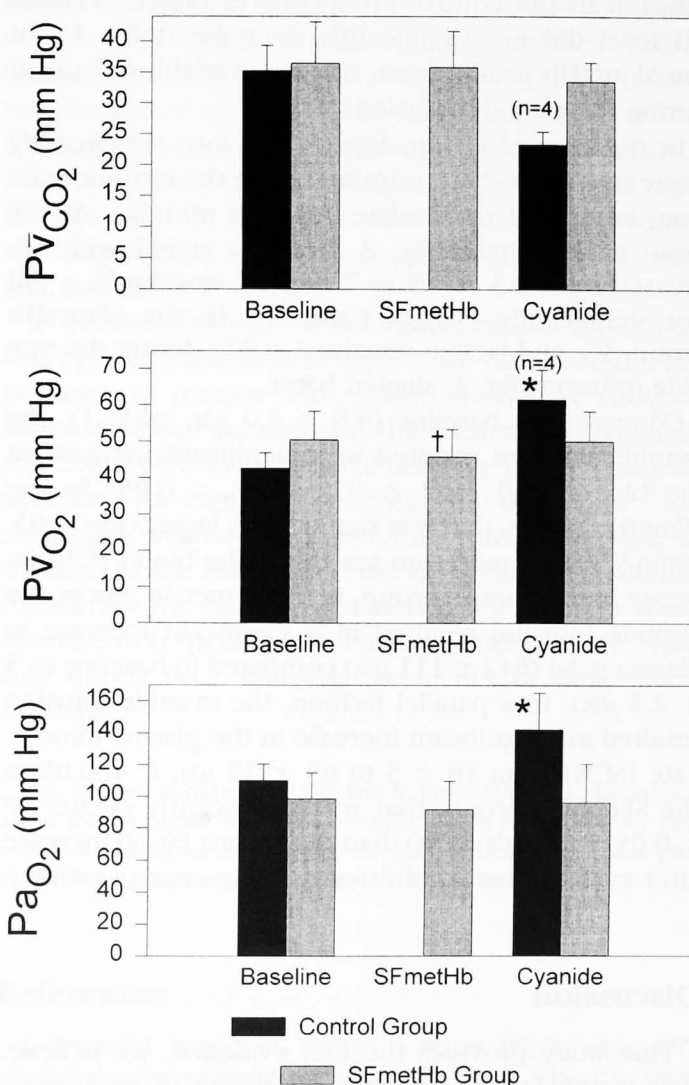

Fig. 2. Mixed venous  $P_{CO_2}$  and  $P_{O_2}$  ( $P\bar{V}_{CO_2}$  and  $P\bar{V}_{O_2}$ , respectively) and arterial blood  $P_{O_2}$  ( $Pa_{O_2}$ ) (mean  $\pm$  SD,  $n = 5$ ) in the control and stroma-free methemoglobin groups of dogs at baseline, after intravenous administration of stroma-free methemoglobin in the stroma-free methemoglobin group, and at the end of the cyanide infusion. \*Significant difference ( $P < 0.05$ ) from baseline. †Significant difference ( $P < 0.05$ ) from the other measurements in the stroma-free methemoglobin group.

l/min. While arterial blood pressure and heart rate did not significantly change (table 1), pulmonary artery pressure increased significantly during the cyanide infusion ( $24.2 \pm 5.5$  mmHg), compared to baseline ( $12.8 \pm 0.8$  mmHg). In contrast, in the SFmetHb group,  $\dot{Q}T$  did not decrease below baseline measurements during the cyanide infusion (fig. 1, shaded bars).

Blood gas data are displayed in figure 2. In the control group, compared to baseline, the cyanide infusion tended to decrease  $P\bar{V}_{CO_2}$  from  $35 \pm 4$  to  $23 \pm 2$  mmHg and significantly increased  $P\bar{V}_{O_2}$  from  $43 \pm 4$  to  $62 \pm 8$  mmHg. Arterial  $P_{O_2}$  also increased during the cyanide infusion in the control group (lower panel). Venous pH level did not significantly decrease (table 1). In the SFmetHb group, none of these variables changed during the cyanide infusion.

In the control group,  $\dot{V}_{O_2}$  (fig. 3, top) significantly decreased to  $64 \pm 19$  ml/min during the cyanide infusion, compared to baseline ( $93 \pm 8$  ml/min). At the same time, lactate (fig. 3, bottom) significantly increased from  $2.3 \pm 0.5$  to  $7.1 \pm 0.7$  mM but  $\dot{V}_{CO_2}$  did not significantly change (table 1). In the SFmetHb group,  $\dot{V}_{O_2}$  and lactate remained stable during the cyanide infusion (fig. 3, shaded bars).

Compared to baseline ( $4.8 \pm 1.0$   $\mu$ M, table 1), the cyanide infusion resulted in a significant increase in the blood [CN] ( $452 \pm 97$   $\mu$ M,  $P < 0.05$ ) in the SFmetHb group, that was significantly larger ( $P < 0.05$ , Mann-Whitney rank sum test) than the blood [CN] increase in the control group. In the SFmetHb group, the cyanide infusion resulted in a significant increase in plasma [CN] ( $612 \pm 111$   $\mu$ M) compared to baseline ( $3.3 \pm 2.4$   $\mu$ M). In a parallel fashion, the cyanide infusion resulted in a significant increase in the plasma thiocyanate [SCN] from  $18 \pm 5$  to  $65 \pm 22$   $\mu$ M,  $P < 0.05$  in the SFmetHb group, that was significantly greater ( $P < 0.05$ , Student's *t* test) than the plasma [SCN] increase after cyanide was administered in the control group.

## Discussion

This study provides the first evidence, we believe, that prophylactic intravenous infusion of exogenous SFmetHb (0.9 g/kg) preserved cardiovascular and metabolic function in dogs exposed to a significant amount of intravenous cyanide, without compromising oxygen-carrying capacity in the blood. In contrast, animals that did not receive SFmetHb had significant percent decreases in  $\dot{Q}T$  (48%) and  $\dot{V}_{O_2}$  (32%), and a significant

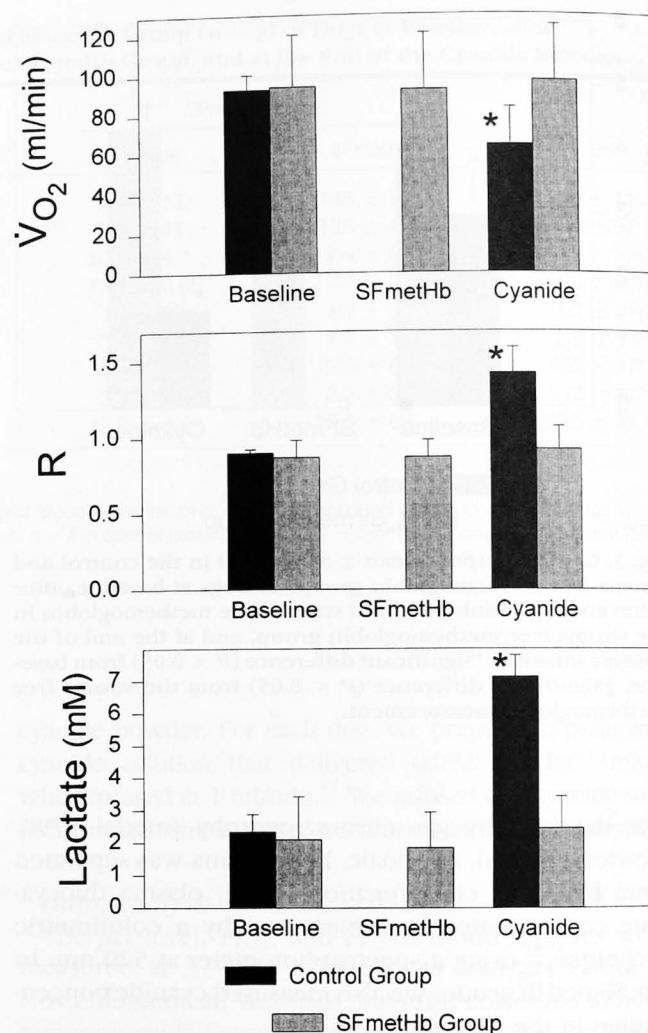

Fig. 3. Oxygen consumption ( $\dot{V}_{O_2}$ ), respiratory quotient ( $R = \dot{V}_{CO_2}/\dot{V}_{O_2}$ ), and venous lactate concentration (mean  $\pm$  SD,  $n = 5$ ) in the control and stroma-free methemoglobin groups of dogs at baseline, after intravenous administration of stroma-free methemoglobin in the stroma-free methemoglobin group, and at the end of the cyanide infusion. \*Significant difference ( $P < 0.05$ ) from baseline.

increase in venous lactate by 4.8 mM, during the same cyanide exposure. Previous studies in rats have showed that, after cyanide infusion, survival was significantly improved by administration of SFmetHb,<sup>16,17</sup> but cardiovascular and metabolic function were not studied.

Furthermore, the infusion of SFmetHb itself had little effect on any cardiovascular or metabolic variable. The observed decrease in heart rate during the SFmetHb infusion (table 1) has been reported in spontaneously contracting neonatal rat myocytes exposed to bovine SFmetHb.<sup>22</sup>

The ferric heme group of methemoglobin avidly

binds cyanide<sup>23</sup> and of endogenous methemoglobin of amyloid nitric oxide during fires with carbon monoxide. Hemoglobin decreases blood that may cause anence of carboxyhemoglobin that intravenous SFmetHb is our amount of cyanide before it could and paralytic and of metabolic and That SFmetHb it could reach the measurements of nate. The total blood higher in the SFmetHb dogs because the concentration, which phase,<sup>19</sup> includes including SFmetHb cyanide concentration of cyanide in ment. The lower control animals, reflects more tissue. Furthermore, the cyanide in the blood in the rhodanese cyanide to thiocyanate were greater in the because the cyanide compartment, was avidly equilibrating "sulfane" sulfur.<sup>24</sup> Cyanide entered the the mitochondria of cyanide antidote fate<sup>2,26</sup> limit their We selected a c was 2.4 times greater administered to the cyanide in the blood age of SFmetHb. survival in rats,<sup>17</sup> a binding ratio (SFmetHb) gesting a generous is administered.



## STROMA-FREE METHEMOGLOBIN DURING CYANIDE POISONING

binds cyanide<sup>23</sup> and forms the rationale for induction of endogenous methemoglobinemia, usually by inhalation of amyl nitrite or infusion of sodium nitrite.<sup>5</sup> But, during fires with smoke inhalation and exposure to carbon monoxide, conversion of hemoglobin to methemoglobin decreases the oxygen-carrying capacity of blood that may already be compromised by the presence of carboxyhemoglobin.<sup>1,2</sup> Instead, we propose that intravenous administration of exogenous bovine SFmetHb to our study dogs trapped a significant amount of cyanide in the intravascular compartment before it could reach the intracellular compartment and paralyze aerobic metabolism, as evidenced by lack of metabolic and cardiovascular depression.

That SFmetHb trapped cyanide in the blood before it could reach the tissues is evident in the intravascular measurements of cyanide and its metabolite, thiocyanate. The total blood concentrations of cyanide were higher in the SFmetHb-treated animals than the control dogs because the measurement of blood cyanide concentration, which forces all cyanide into the gaseous phase,<sup>19</sup> includes cyanide in all blood components, including SFmetHb in plasma. Indeed, high plasma cyanide concentration in the SFmetHb group reflects trapping of cyanide by SFmetHb in the vascular compartment. The lower amounts of blood cyanide in the control animals, which did not receive SFmetHb, reflects more tissue uptake of the toxin.

Furthermore, thiocyanate is the normal metabolite of cyanide in the body.<sup>2</sup> Thiosulfate can be a sulfur donor in the rhodanese-catalyzed reaction to metabolize cyanide to thiocyanate.<sup>24,25</sup> Plasma SCN concentrations were greater in the SFmetHb-treated dogs presumably because the cyanide, trapped in the intravascular compartment, was available for detoxification by the rapidly equilibrating physiologic pool of cyanide-reactive "sulfane" sulfur.<sup>2,24,25</sup> In the control group, once cyanide entered the cellular compartment and penetrated the mitochondria, the generally extracellular locations of cyanide antidotes (such as SFmetHb or thiosulfate<sup>2,26</sup>) limit their effectiveness.

We selected a cyanide-binding dose of SFmetHb that was 2.4 times greater than the molar cyanide dose administered to the animal, to maximize chelation of cyanide in the blood compartment,<sup>27</sup> without excess dosage of SFmetHb. To significantly increase animal survival in rats,<sup>17</sup> a much greater equivalence molar binding ratio (SFmetHb:CN) was used (9.2–36), suggesting a generous margin of safety if excess SFmetHb is administered.

The urinary half-life elimination of SFmetHb solutions is about 3–5 h.<sup>17</sup> Accordingly, in the prophylaxis of cyanide poisoning, stroma-free cyano-methemoglobin is relatively rapidly excreted in urine to provide a one-step therapeutic method to inactivate and eliminate cyanide from the body.

Exogenous mammalian SFmetHb can be relatively easily produced and stored.<sup>17,28</sup> Indeed, a major challenge in the use of SFmetHb as a blood substitute has been preventing its oxidation to methemoglobin—that reaction is easily catalyzed in the laboratory. Lyophilization of hemoglobin preparations<sup>29</sup> adds further potential for storage and stability. To demonstrate that intravenous SFmetHb is safe in humans requires studies seeking potential side effects on glomerular filtration rate, immunoreactivity, reticuloendothelial system, *etc.* Then, we speculate that SFmetHb might be administered preemptively to emergency personnel at high risk for cyanide exposure, including rescue workers entering fires or industrial accidents and soldiers subject to chemical warfare.

In previous models of combined carbon monoxide and cyanide poisoning in dogs,<sup>1,2</sup> we discussed the importance of oxygen and sodium thiosulfate (despite its extracellular location) in the treatment of cyanide toxicity. However, additional antidote therapy may be necessary for complete detoxification of cyanide.<sup>2</sup> Accordingly, we also envision future studies that test, in addition to the established use of oxygen and sodium thiosulfate, the efficacy of SFmetHb as a third-line treatment agent (especially pre-hospital) after cyanide exposure during fires, industrial accidents, or other toxic exposure.

The authors acknowledge the late S. Bursztein, M.D., for advice about the metabolic monitor and thank Helen Rosenberg for biochemical and blood gas analysis. Stroma-free hemoglobin was provided by Biopure Corporation, Boston, Massachusetts.

## References

1. Breen PH, Isserles SA, Westley J, Roizen MF, Taitelman UZ: Combined carbon monoxide and cyanide poisoning: A place for treatment? *Anesth Analg* 1995; 80:671–7
2. Breen PH, Isserles SA, Westley J, Roizen MF, Taitelman UZ: Effect of oxygen and thiosulfate during combined carbon monoxide and cyanide poisoning. *Toxicol Appl Pharmacol* 1995; 134:229–34
3. Clark CJ, Campbell D, Reid WH: Blood carboxyhaemoglobin and cyanide levels in fire survivors. *Lancet* 1981; 1:1332–5
4. Mohler SR: Air crash survival: Injuries and evacuation toxic hazards. *Aviat Space Env Med* 1975; 46:86–8

5. Kulig K: Cyanide antidotes and fire toxicology (editorial). *N Engl J Med* 1991; 325:1801-2
6. Norris JC, Moore SJ, Hume AS: Synergistic lethality induced by the combination of carbon monoxide and cyanide. *Toxicology* 1986; 40:121-9
7. Baud EJ, Barriot P, Toffis V, Riou B, Vicaud E, Lecarpentier Y, Bourdon R, Astier A, Bismuth C: Elevated blood cyanide concentrations in victims of smoke inhalation. *N Engl J Med* 1991; 325:1761-6
8. Christel D, Eyer P, Hegemann M, Kiese M, Lorcher W, Weger N: Pharmacokinetics of cyanide in poisoning of dogs, and the effect of 4-dimethylaminophenol or thiosulfate. *Arch Toxicol* 1977; 38:177-89
9. Ivankovich AD, Braverman B, Kanuru RP, Heyman HJ, Paulsian R: Cyanide antidotes and methods of their administration in dogs: A comparative study. *Anesthesiology* 1980; 52:210-16
10. Isom GE, Way JL: Effects of oxygen on the antagonism of cyanide intoxication: Cytochrome oxidase, in vitro. *Toxicol Appl Pharmacol* 1984; 74:57-62
11. Klimmek R, Roddewig C, Fladerer H, Weger N: Cerebral blood flow, circulation, and blood homeostasis of dogs during slow cyanide poisoning and after treatment with 4-dimethylaminophenol. *Arch Toxicol* 1982; 50:65-76
12. Way JL, Gibbon SL, Sheehy M: Cyanide intoxication: Protection with oxygen. *Science* 1966; 152:210-11
13. Pitt BR, Radford EP, Gurtner GH, Traystman RJ: Interaction of carbon monoxide and cyanide on cerebral circulation and metabolism. *Arch Environ Health* 1979; 34:354-9
14. Moore SJ, Ho IK, Hume AS: Severe hypoxia produced by concomitant intoxication with sublethal doses of carbon monoxide and cyanide. *Toxicol Appl Pharmacol* 1991; 109:412-20
15. Moore SJ, Norris JC, Walsh DA, Hume AS: Antidotal use of methemoglobin forming cyanide antagonists in concurrent carbon monoxide/cyanide intoxication. *J Pharmacol Exp Ther* 1987; 242:70-3
16. Ten Eyck RP, Schaerdel AD, Ottinger WE: Comparison of nitrite treatment and stroma-free methemoglobin solution as antidotes for cyanide poisoning in a rat model. *J Toxicol Clin Toxicol* 1985; 23:477-87
17. Ten Eyck RP, Schaerdel AD, Lynett JE, Marks DH, Patrissi GA, Ottinger WE, Stansell MJ: Stroma-free methemoglobin solution as an antidote for cyanide poisoning: A preliminary study. *J Toxicol Clin Toxicol* 1983; 21:343-58
18. Thomas LJ, Jr: Algorithms for selected blood acid-base and blood gas calculations. *J Appl Physiol* 1972; 33:154-8
19. Darr RW, Capson TL, Hileman FD: Determination of hydrogen cyanide in blood using gas chromatography with alkali thermionic detection. *Anal Chem* 1980; 52:1379-81
20. Pettigrew AR, Fell GS: Simplified colorimetric determination of thiocyanate in biological fluids, and its application to investigation of the toxic amblyopias. *Clin Chem* 1972; 18:996-1000
21. Glantz SA: *Primer of Biostatistics*. New York, McGraw-Hill, 1987, pp. 265-77, 91-6
22. Walter SV, Chang TM: Chronotropic effects of in vitro perfusion with albumin, stroma-free hemoglobin, and polyhemoglobin solutions. *Biomater Artif Cells Artif Organs* 1990; 18:283-98
23. Smith L, Kruszyna H, Smith RP: The effect of methemoglobin on the inhibition of cytochrome c oxidase by cyanide, sulfide or azide. *Biochem Pharmacol* 1977; 26:2247-50
24. Westley J: Mammalian cyanide detoxification with sulphane sulphur. *Cyanide Compounds in Biology*, Ciba Foundation Symposium No. 140. Edited by Evered D, Harnett S. Wiley, Chichester, 1988, pp 201-18
25. Westley J: Depletion of the sulphane pool: Toxicological implications, *Sulphur-Containing Drugs and Related Organic Compounds*, Vol.2. Edited by Damani LA. Wiley, Chichester, 1989, pp 87-99
26. Sylvester DM, Hayton WL, Morgan RL, Way JL: Effects of thiosulfate on cyanide pharmacokinetics in dogs. *Toxicol Appl Pharmacol* 1983; 69:265-71
27. Galzigna L, Gobbato F, Saia B: Binding of cyanide to methemoglobin. *Experientia* 1968; 24:132-3
28. Kan P, Lee CJ: Application of aqueous two-phase systems in separation/purification of stroma free hemoglobin from animal blood. *Artif Cells Blood Substit Immobil Biotechnol* 1994; 22:641-9
29. Rabinovici R, Rudolph AS, Vernick J, Feuerstein G: Lyophilized liposome encapsulated hemoglobin: Evaluation of hemodynamic, biochemical, and hematologic responses. *Crit Care Med* 1994; 22:480-5
